# Supplementary material
Source: PubMed Central journal article supplement (PMC6728444)
Supplement: DS_10.1177_0022034511423399.pdf [file DS_10.1177_0022034511423399.pdf]

## RESEARCH REPORTS

### Biological

J.-Y. Sire<sup>1\*</sup>, Y. Huang<sup>2,3</sup>, W. Li<sup>2</sup>, S. Delgado<sup>1</sup>,  
M. Goldberg<sup>4</sup>, and P.K. Den Besten<sup>2</sup>

<sup>1</sup>Evolution & Développement du squelette, UMR 7138, Université Pierre et Marie Curie, 7 Quai Saint-Bernard, Bat A2, Case 5, 75005 Paris, France; <sup>2</sup>Department of Orofacial Sciences, University of California at San Francisco, San Francisco, CA, USA; <sup>3</sup>Guanghua School of Stomatology, Sun Yat-sen University, Guangzhou, Guangdong, P.R. China; and <sup>4</sup>Laboratoire Différenciation de Cellules Souches et Prions, U747, Université Paris Descartes, Paris, France; \*corresponding author, jean-yves.sire@upmc.fr

*J Dent Res* DOI: 10.1177/0022034511423399

## APPENDICES

### APPENDIX 1

Common names, Latin names, reference to genome assembly, and accession numbers of *AMEL* sequences of the 39 tetrapod species used in this study.

### MAMMALIA (37 SPECIES)

#### Primates (11)

Human, *Homo sapiens*, GRC\_h37, NM\_182680 (*AMELX*), NM\_001143 (*AMELY*) - Chimpanzee, *Pan troglodytes*, CHIMP2.1, EF537869 - Gorilla, *Gorilla gorilla*, gorGOR3, present study - Orangutan, *Pongo pygmaeus*, PPYG2, EF537870 - Gibbon, *Nomascus leucogenys*, present study - Rhesus monkey, *Macaca mulatta*, MMUL1.0, EF537871 - Baboon, *Papio hamadryas*, Pham, present study - Marmoset, *Callithrix jacchus*, Callithrix\_jacchus-3.2, EF537872 - Bushbaby, *Otolemur garnettii*, otoGar1, AB091787 - Mouse lemur, *Microcebus murinus*, micMur1, present study - Tarsier, *Tarsius syrichta*, tarSyr1, EF537873.

#### Scandentia (1)

Tree shrew, *Tupaia belangeri*, tupBel1, EU168855.

#### Rodentia (6)

Mouse, *Mus musculus*, NCB1\_m37, NM\_009666 - Rat, *Rattus norvegicus*, RGSC\_3.4, U51195 - Deer mouse, *Peromyscus maniculatus*, present study - Kangaroo rat, *Dipodomys ordii*, dipOrd1, present study - Guinea pig, *Cavia porcellus*, cavPor3, AJ012200 - Squirrel, *Spermophilus tridecemlineatus*, speTri1, EU168861.

#### Leurasiatheria (11)

Cow, *Bos taurus*, Btau\_4.0, EU168863 - Alpaca, *Vicugna pacos*, vicPac1, present study - Pig, *Sus scrofa*, Sscrofa9, U43405 - Dolphin, *Tursiops truncatus*, turTru1, AH014446 - Horse, *Equus caballus*, EquCab2, AB032193 - Dog, *Canis lupus*

## Evolutionary Story of Mammalian-specific Amelogenin Exons 4, "4b", 8, and 9

*familiaris*, CanFam\_2.0, EU168873 - Cat, *Felis catus*, CAT, EU168880 - Macrobat, *Pteropus vampyrus*, pteVam1, EU168886 - Microbat, *Myotis lucifugus*, myoLuc1, EU168887 - Hedgehog, *Erinaceus europaeus*, eriEur1, EU168884 - Shrew, *Sorex araneus*, sorAra1, EU168888.

#### Afrotheria (8)

Armadillo, *Dasypus novemcinctus*, dasNov2, present study - Sloth, *Choloepus hoffmanni*, choHof1, present study - Elephant, *Loxodonta africana*, Loxafr\_3.0, AY788990 - Tenrec, *Echinops telfairi*, TENREC, EU168892 - Hyrax, *Procavia capensis*, proCap1, EU168895 - Opossum, *Monodelphis domestica*, monDom5, U43407 - Wallaby, *Macropus eugenii*, Meug\_1.0, present study - Platypus, *Ornithorhynchus anatinus*, OANA5, AF095566.

### SAUROPSIDA

Anole, *Anolis carolinensis*, AnoCar1, present study.

### AMPHIBIA

Western clawed toad, *Xenopus tropicalis*, JGI\_4.1, NM\_00113681.

## APPENDIX 2

### Description of the Hyphy Method

In the analyses, four values were computed for every variable site: observed and normalized expected numbers of synonymous ( $N_s$  and  $E_s$ ) and non-synonymous ( $N_N$  and  $E_N$ ) substitutions.

Hyphy (for HYpothesis testing using PHYlogenies) software (<http://hyphy.org>; Pond *et al.*, 2005), or its improved online version, SLAC (for Single Likelihood Ancestor Counting; <http://www.datamonkey.org>), estimates  $d_N = N_N/E_N$  and  $d_S = N_S/E_S$ . When  $d_N > d_S$ , a codon is considered positively selected. When  $d_N < d_S$ , a codon is considered negatively selected.

A p-value derived from a two-tailed extended binomial distribution was used to assess significance. It is worth noting

that the extended binomial distribution is an approximation of the true distribution of non-synonymous and synonymous under the hypothesis of neutrality (Pond *et al.*, 2005). The model assumes that, under neutrality, a random substitution will be synonymous with probability  $P = E_S / (E_S + E_N)$ , and computes how likely P is when  $N_S$ , out of  $N_N + N_S$  substitutions, are synonymous. SLAC uses a p-value of the extended binomial distribution that is different from the p-values that derive from a simulation of the null distribution (*i.e.*,  $d_N = d_S$ ). The parameter chosen for significance level was 0.2. Indeed, given our dataset of sequences, such a p-value is considered appropriate to detect true positives in datasets containing more than 30 sequences, and SLAC is one of the only methods that allow a high p-value (Pond *et al.*, 2005).

### Hyphy Results

| Codon | dN-dS    | Normalized dN-dS | p-value  |
|-------|----------|------------------|----------|
| 4     | 0.671437 | 0.160971         | 0.152221 |
| 8     | 1.14821  | 0.275273         | 0.118766 |
| 9     | 0.717396 | 0.171989         | 0.177939 |
| 14    | 0.837361 | 0.200749         | 0.131821 |
| 15    | 0.772594 | 0.185222         | 0.158807 |

### APPENDIX REFERENCE

Pond SLK, Frost SD, Muse SV (2005). HyPhy: hypothesis testing using phylogenies. *Bioinformatics* 21:676-679.

### APPENDIX 3

| Primer Pairs | Forward Primers       |           | Reversed Primers       |                 | PCR Products (bp) |            |
|--------------|-----------------------|-----------|------------------------|-----------------|-------------------|------------|
|              | Sequences             | Locations | Sequences              | Locations       | gDNA              | cDNA       |
| M1           | CCGAAGTGGATACTTGGTTG  | exon 7    | ATGCCTTGTCATGCCCTGGTA  | exon 8          | 2132              | not tested |
| M2           | ATCATCCCTGTGCTGTCTC   | exon 6    |                        |                 | 3993              | 413        |
| M3           | CTCTGCCTCCACTGTCTC    | exon 6    | TTGATAGCCTGAGAATGTGAC  | exon "4b"       | 3704              | 124        |
| M4           | ACCACTCCATGACTCCAAC   | exon 6    |                        |                 | 3869              | 289        |
| H1           | CCATGCTTCCTGATCTGACTC | exon 6    | TGTAGGAAATTGGTTGAAGTCG | putative exon 9 | 4212              | 114        |
| H2           | AAATCATCCCCGTGCTGTC   | exon 6    | GTAGGAAATTGGTTGAAGTCGT | putative exon 9 | 4526              | 428        |

Sequences and locations of the primers used for PCR amplifications. The sizes of PCR products for gDNA and cDNA templates are predicted from gDNA and putative cDNA sequences. All primers amplified gDNA templates by PCR and showed correct PCR product sizes.
